# Supplementary material for: A multimethod research investigation of consumer involvement in Australian health service accreditation programmes: the ACCREDIT-SCI study protocol
Source: PubMed Central journal article supplement — BMJ Open. 2012 Oct 10;2(5):e002024. doi: 10.1136/bmjopen-2012-002024 (PMC3488739; doi:10.1136/bmjopen-2012-002024), 2012-10-10

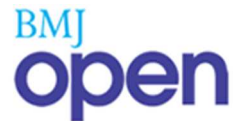

**A multi-method research investigation of consumer involvement in Australian health service accreditation programs: the ACCREDIT-SCI study protocol**

|                                 |                                                                                                                                                                                                                                                                                                                                                                                                                                                                                                                                                                                                                                                                              |
|---------------------------------|------------------------------------------------------------------------------------------------------------------------------------------------------------------------------------------------------------------------------------------------------------------------------------------------------------------------------------------------------------------------------------------------------------------------------------------------------------------------------------------------------------------------------------------------------------------------------------------------------------------------------------------------------------------------------|
| Journal:                        | <i>BMJ Open</i>                                                                                                                                                                                                                                                                                                                                                                                                                                                                                                                                                                                                                                                              |
| Manuscript ID:                  | bmjopen-2012-002024                                                                                                                                                                                                                                                                                                                                                                                                                                                                                                                                                                                                                                                          |
| Article Type:                   | Protocol                                                                                                                                                                                                                                                                                                                                                                                                                                                                                                                                                                                                                                                                     |
| Date Submitted by the Author:   | 28-Aug-2012                                                                                                                                                                                                                                                                                                                                                                                                                                                                                                                                                                                                                                                                  |
| Complete List of Authors:       | Greenfield, David; University of New South Wales, Centre for Clinical Governance Research<br>Hinchcliff, Reece; University of New South Wales, Centre for Clinical Governance Research<br>Moldovan, Max; University of New South Wales, Centre for Clinical Governance Research<br>Mumford, Virginia; University of New South Wales, Centre for Clinical Governance Research<br>Pawsey, Marjorie; University of New South Wales, Centre for Clinical Governance Research<br>Westbrook, Johanna; University of New South Wales, Centre for Health Systems and Safety Research<br>Braithwaite, Jeffrey; University of New South Wales, Centre for Clinical Governance Research |
| <b>Primary Subject Heading</b>: | Health services research                                                                                                                                                                                                                                                                                                                                                                                                                                                                                                                                                                                                                                                     |
| Secondary Subject Heading:      | Health policy                                                                                                                                                                                                                                                                                                                                                                                                                                                                                                                                                                                                                                                                |
| Keywords:                       | Quality in health care < HEALTH SERVICES ADMINISTRATION & MANAGEMENT, Organisation of health services < HEALTH SERVICES ADMINISTRATION & MANAGEMENT, Change management < HEALTH SERVICES ADMINISTRATION & MANAGEMENT                                                                                                                                                                                                                                                                                                                                                                                                                                                         |
|                                 |                                                                                                                                                                                                                                                                                                                                                                                                                                                                                                                                                                                                                                                                              |

SCHOLARONE™  
Manuscripts

# A multi-method research investigation of consumer involvement in Australian health service accreditation programs: the ACCREDIT-SCI study protocol

## ABSTRACT

**Introduction:** Health service accreditation programs are a regulatory mechanism adopted to drive improvements inpatient safety and quality. Research investigating the benefits, or limitations, of consumer involvement in accreditation programs is negligible. To develop our knowledge in this area the ACCREDIT collaboration (Accreditation Collaborative for the Conduct of Research, Evaluation and Designated Investigations through Teamwork) has developed a research plan, known as the ACCREDIT-SCI (Standards of Consumer Involvement) study protocol. Two complementary studies have been designed: one, to examine the effectiveness of a standard for consumer participation; and two, to explore how patient experiences vary across a range of settings with differing accreditation results.

**Methods and design:** The research setting is the Australian health care system, and the two studies focus on three accreditation programs in the primary, acute and aged care domains. The studies will use multi-methods: document analysis; interviews; and surveys. Participants will be stakeholders across the three domains including: policy officers; frontline healthcare professionals; accreditation agency personnel, including surveyors; and healthcare consumers. Drawing on previous experience, the research team has developed purpose-designed tools. Data will be analysed using thematic, narrative, and statistical (descriptive and inferential) procedures.

**Ethics and dissemination:** The University of New South Wales Human Research Ethics Committee has approved the two studies (HREC 10274). Findings will be disseminated through

1  
2  
3 seminars, conference presentations, academic publications and research partner websites. The  
4  
5 findings will be formulated to facilitate uptake by policy and accreditation agency professionals,  
6  
7 researchers and academics, and consumers, nationally and internationally.  
8  
9  
10

## 11 12 13 14 15 **ARTICLE SUMMARY** 16

### 17 18 **Article focus**

- 19 ▪ To provide a research protocol that aims to investigate consumer involvement in Australian health  
20 service accreditation programs. Two studies with multiple components have been conceptualised. The  
21 first examines the effectiveness of a standard for consumer participation, and the second explores how  
22 patient experiences vary across a range of settings with differing accreditation results.  
23  
24  
25

### 26 27 **Key messages**

- 28 ▪ Governments and health care organisations around the world have adopted accreditation programs as  
29 a strategy to regulate the quality and safety of clinical care and organisational performance.
- 30 ▪ Empirical research into the value of consumer involvement in accreditation programs is limited and  
31 where there are studies, the findings are ambiguous.
- 32 ▪ The two studies presented in the ACCREDIT-SCI study protocol will use multi-methods to examine  
33 consumer involvement in accreditation programs, and triangulate findings.  
34  
35  
36  
37

### 38 39 **Strengths and limitations of this study**

- 40 ▪ The investigation of health service accreditation programs across the healthcare continuum of  
41 primary, acute and aged care is a strength of this study. Additionally, the collaborative research  
42 partnership between researchers and accreditation stakeholders, presents the opportunity for  
43 translational research to drive improvements in the health system.
- 44 ▪ The focus on accreditation programs within a single country is a limitation of the study.  
45  
46  
47  
48

## INTRODUCTION

### Health service accreditation

Health service accreditation programs are a regulatory mechanism adopted globally to drive improvements in patient safety and quality.<sup>1-3</sup> They are complex organisational interventions that seek to reassure external stakeholders, including consumers, that healthcare industry safety and quality standards are being achieved and improved. Accreditation programs are used across the health care continuum of primary, acute and aged care services.<sup>4</sup> Whilst there are variations between countries, and the health systems within them, in the regulatory frameworks that contextualise and operationalise accreditation programs, a common model has evolved.<sup>5</sup> Health care organisations (HCOs) enrol with an accrediting agency and self-assess against their standards. Accreditation standards comprise a set of performance statements and associated criteria and outcomes or actions. HCOs produce reports that document their quality maintenance and improvement activities against the accreditation standards. Reports are reviewed by the accrediting agency which sends teams of peer-reviewers, usually known as surveyors, to conduct onsite visits to validate the claims. When visiting HCOs, surveyors conduct observations of facilities, interviews with staff and document analysis of organisational reports, meeting minutes, quality improvement projects and policies and procedures.<sup>6</sup> Surveyors provide verbal feedback to the HCO on their assessment of their achievement against the accreditation standards, including, where appropriate, remedial actions recommended. Written survey reports are provided to the accrediting agency that decides on conferring accreditation status, or not. Accreditation status is the declaration by the accreditation agency, an external authority, that HCOs have demonstrated competency against recognised industry-based safety and quality standards.<sup>5</sup> Accreditation status is typically for a period of three to five years.

## Consumer participation in health service accreditation programs

Consumer participation in healthcare decision making and health services governance has become an internationally accepted target.<sup>7</sup> Studies have shown benefits from consumer participation in both the clinical<sup>8-9</sup> and organisational<sup>10</sup> domains. However, research investigating the benefits, or limitations, of consumer participation in accreditation programs is negligible;<sup>1-4</sup> only two studies have been identified.<sup>11-12</sup> In one study, an evaluation of consumers as surveyors in an accreditation program highlighted stakeholder perceptions of an increase in survey teams' objectivity and credibility. The role of the consumer surveyor was identified as needing to be clarified and more consistently applied. Additionally, their capacity to contribute to rating of criteria and writing of the survey report was noted as problematical.<sup>11</sup> A second study examined accreditation performance against consumer involvement in health services, reporting no relationship between the two.<sup>12</sup>

Beyond this research, there are a limited number of studies that relate consumer views about care received or patient satisfaction with services, with accreditation outcomes. Where they have been done, studies show no clear or consistent findings.<sup>4</sup> No relationship between hospital accreditation outcomes and patient satisfaction have been identified.<sup>13-15</sup> Accredited health services have not been rated higher than non-accredited organisations against patient-reported quality measures.<sup>16</sup> Conversely, another study demonstrated that accredited health units performed better than non-accredited units on patient satisfaction measures.<sup>17</sup> Similarities and differences in patient and health professionals' assessment of accreditation standards of care have been identified.<sup>18</sup> In the related area of accreditation of medical practices in primary care, patient experience data have been shown to assist in improving medical practice quality.<sup>19</sup> Nevertheless, the study concluded that knowing how and to what extent patient experience data

1  
2  
3 are to be included in accreditation decisions has yet to be defined.<sup>19</sup> In short, the existing  
4  
5 empirical evidence is both limited and ambiguous as to the value of consumer involvement in  
6  
7 health accreditation programs.<sup>5615-17</sup> The motivation for the present study is to address this  
8  
9 knowledge deficit.  
10  
11  
12  
13

### 14 15 16 17 **The research context: the ACCREDIT collaboration**

18  
19 In Australia, to investigate healthcare accreditation a collaborative research partnership has been  
20  
21 formed involving academic health care researchers, accreditation agencies from across the care  
22  
23 continuum of primary, acute and aged care, and quality improvement bodies at national and state  
24  
25 levels: the Accreditation Collaborative for the Conduct of Research, Evaluation and Designated  
26  
27 Investigations through Teamwork (ACCREDIT).<sup>1</sup> The organisational partners are: the Centre for  
28  
29 Clinical Governance Research and Centre for Health Systems and Safety Research, in the  
30  
31 Australian Institute of Health Innovation at the University of New South Wales (UNSW);  
32  
33 Australian General Practice Accreditation Limited (AGPAL); the Australian Council on  
34  
35 Healthcare Standards (ACHS); Aged Care and Standards Accreditation Agency (ACSAA); the  
36  
37 Australian Commission on Safety and Quality in Health Care (ACSQHC); and the Clinical  
38  
39 Excellence Commission (CEC) from the state of New South Wales. The ACCREDIT  
40  
41 collaboration also has an international advisory group (IAG) providing expert advice and critique  
42  
43 to their work. The IAG members are prominent health care quality and safety and health services  
44  
45 researchers based in Europe.  
46  
47  
48  
49  
50  
51

52  
53 The ACCREDIT collaboration have scoped a research project with four aims: evaluate current  
54  
55 accreditation processes; analyse the costs and benefits of accreditation; improve future  
56  
57  
58  
59  
60

1  
2  
3 accreditation via evidence; and develop and apply new standards of consumer involvement in  
4 accreditation. These aims emerged from the melding of ideas from: previous research into  
5 healthcare accreditation;<sup>2 4 6 12 20-26</sup> literature reviews;<sup>4 27-28</sup> a workshop consultation with the  
6 partners and other accreditation stakeholders;<sup>29</sup> and extended negotiations to clarify and focus the  
7 research agenda. In 2010, the ACCREDIT collaboration became the recipient of an Australian  
8 Research Council linkage grant (LP100200586). These grants are awarded to research projects  
9 that have significant academic merit and the ability to generate findings to benefit Australian  
10 industry and society,<sup>30</sup> and international parties with interest in the area.  
11  
12  
13  
14  
15  
16  
17  
18  
19  
20  
21  
22  
23  
24  
25

## 26 **METHODS AND ANALYSIS**

27  
28 This research protocol details the investigation of consumer involvement in Australian health  
29 service accreditation programs within the ACCREDIT project; known as the ACCREDIT-SCI  
30 (Standards of Consumer Involvement) study protocol. To achieve this aim, two studies have  
31 been conceptualised with multiple components. The studies correspond to studies 4 and 5  
32 outlined in the overarching ACCREDIT design.<sup>1</sup> The first examines the effectiveness of a  
33 standard for consumer participation, and the second explores how patient experiences vary  
34 across a range of settings with differing accreditation results. To counteract potential limitations  
35 of any single research method, a multi-method approach will be used. This strategy enables  
36 triangulation of data sources and promotes credibility of findings.<sup>31</sup>  
37  
38  
39  
40  
41  
42  
43  
44  
45  
46  
47  
48  
49  
50  
51

### 52 **Study 1: examining a standard for consumer participation**

53  
54 In the intervening period since the key questions and details were agreed to by the partners and  
55 encoded into a funded proposal,<sup>1</sup> the ACSQHC developed a new Australian national standard for  
56  
57  
58  
59  
60

1  
2  
3 consumer participation. The standard *Partnering with Consumers* is one of the new ten  
4  
5 Australian National Safety and Quality Health Service Standards (NSQHSS).<sup>32</sup> The work of the  
6  
7 ACSQHC has superseded the first three aspects of the consumer involvement study as proposed  
8  
9 in the overarching ACCREDIT project design.<sup>1</sup> Consequently, the study has been revised to  
10  
11 accommodate the changed contextual circumstances and is now comprised of three parts:  
12  
13 conduct a retrospective analysis of the development process for the NSQHSS consumer standard;  
14  
15 apply the standard in the field (n=30); and evaluate its use and efficacy with survey and  
16  
17 qualitative methods.  
18  
19  
20  
21

### 22 23 *Retrospective analysis of consumer standard development processes*

24  
25 The research team will retrospectively analyse the activities and processes used by the ACSQHC  
26  
27 to develop the NSQHSS *Partnering with Consumers* standard. Two evaluation methods will be  
28  
29 used to triangulate findings, including documentary analysis<sup>33</sup> of ACSQHC Standards  
30  
31 Development Committee deliberations and workshop reports. Additionally, semi-structured  
32  
33 interviews with members of the ACSQHC Standards Development Committee will be  
34  
35 conducted. Recruitment and access to key participants and relevant reports will be facilitated by  
36  
37 ACSQHC, who will email potential participants inviting them to take part in the study.  
38  
39 Interviews will be recorded, transcribed and thematically analysed. Drawing on the research  
40  
41 team's knowledge from prior work,<sup>23-25</sup> the issues focusing the evaluation, either by document  
42  
43 analysis or interview method, will include: what evidence was drawn upon for the standard; how  
44  
45 was the evidence assessed; what was the decision making process to include or exclude  
46  
47 evidence; to what extent were the stakeholders engaged; and how does the standard integrate  
48  
49 with the other standards of the NSQHCS?  
50  
51  
52  
53  
54  
55  
56  
57  
58  
59  
60



1  
2  
3 Study information and consent forms, approved by the UNSW Human Research Ethics  
4 Committee (HREC),<sup>34</sup> will be provided to potential participants electronically via email. The  
5  
6 potential informants will be followed up, via telephone calls, after two weeks if there has not  
7  
8 been a response to the invitation. Interviews will be conducted face-to-face where possible, or  
9  
10 alternatively via telephone, in locations suitable for those involved. To promote participant  
11  
12 responses, face-to-face interviews will be the first option. To enhance reliability and internal  
13  
14 comparison of data<sup>35</sup> the researchers involved in interviews will complete a training session  
15  
16 together and use a purpose designed, standardised semi-interview schedule. Furthermore, the  
17  
18 schedule will provide structure for uniformity whilst allowing scope for respondents to expand  
19  
20 on issues important to them. Interviews will be digitally recorded and professionally transcribed.  
21  
22  
23  
24  
25  
26

27  
28 A two-step process will be used to analyse the data. First, the issues employed to direct the  
29  
30 evaluation will be used to collate and thematically group the data from the documentation and  
31  
32 interview transcriptions. Second, a joint approach of a narrative strategy<sup>32</sup> and temporal  
33  
34 bracketing<sup>32</sup> will be used to interpret the data. This strategy involves constructing an account of  
35  
36 the standard development process with time used as the framework to structure the narrative.  
37  
38 This approach is suitable for ordering<sup>32</sup> and examining change events<sup>36</sup> and capturing the  
39  
40 complexity of proceedings.<sup>37</sup>  
41  
42  
43  
44

#### 45 *Apply and evaluate the NSQHCS Partnering with Consumers standard*

46  
47 Thirty accreditation surveys, comprising ten from each healthcare domain, will be chosen using  
48  
49 stratified randomised sampling<sup>38</sup> to examine the implementation and assessment of the NSQHSS  
50  
51 *Partnering with Consumers* standard. Based on prior research experience, including accreditation  
52  
53 research studies,<sup>6 12 22 24</sup> this cohort is expected to be appropriate to provide both depth and  
54  
55 breadth of data to assess the standard. A multi-method approach will be used, involving  
56  
57  
58  
59  
60

1  
2  
3 document analysis, interviews and a survey questionnaire.  
4  
5

6  
7 The research team, in collaboration with the study partners, will map the NSQHSS *Partnering*  
8  
9 *with Consumers* standard to the accreditation standards used in each domain. That is, the  
10  
11 NSQHSS to the ACSAA Accreditation Standards, The Royal College of General Practitioners  
12  
13 Standards for General Practice (4<sup>th</sup> edition), and the ACHS accreditation program, Evaluation  
14  
15 and Quality Improvement Program (EQuIP) version 5, respectively, to identify corresponding  
16  
17 standards and criteria related to consumer participation. These details will be used to focus the  
18  
19 document analysis of the accreditation outcomes and reports, and provide topics and suitable  
20  
21 phrasing of language for the interviews and survey questionnaire.  
22  
23  
24

25  
26 The HCOs accreditation outcomes and survey reports will be collected. Using purposeful  
27  
28 sampling<sup>38</sup> accreditation agencies' representatives and surveyors, and key informants from the  
29  
30 HCOs involved with each survey, will be invited to participate in the study. They will be offered  
31  
32 an individual or group interview and asked to complete a questionnaire. Informed by their  
33  
34 previous work<sup>6 21-22</sup> in this field, the research team will examine the following issues with  
35  
36 participants: what do you understand the standard is aiming to achieve; is your understanding  
37  
38 similar or different to your colleagues and other stakeholders; is the standard easy to survey  
39  
40 against or provide evidence for; what criteria or actions do HCOs implement well and which  
41  
42 others are difficult to implement; what criteria or actions stimulated most discussion between  
43  
44 survey participants; and what, if any, resources are required to implement the *Partnering with*  
45  
46 *Consumers* standard? The same processes for ethics approval, study information, and data  
47  
48 collection outlined above will be applied to the interview data. Analysis will follow accepted  
49  
50 norms for systematic classification of interview data.<sup>39</sup> It will be directed by the principles of  
51  
52 addressing the significant points in the data whilst incorporating key interpretations, with  
53  
54  
55  
56  
57  
58  
59  
60

1  
2  
3 analytical decisions documented by an audit trail and shaped by previous research experience  
4 and findings.<sup>6 24-25 40-42</sup> An inductive process will guide the analysis and the textual grouping  
5  
6 software, NVivo v.9<sup>43</sup> will be employed.  
7  
8  
9

10  
11 A web-based survey, using KeySurvey<sup>44</sup> software, which will take approximately 15 minutes to  
12 complete, will complement the interviews. This technology enables complex question routing  
13 and ease of data collection at a reasonable cost.<sup>45</sup> Focusing on similar topics as the interviews,  
14 the survey will employ a five-point Likert scale<sup>46</sup> with ratings from 'strongly agree' to 'strongly  
15 disagree'. Demographic details on participants will be also collected including: occupational  
16 position; professional background; highest qualification; and level of experience with  
17 accreditation surveys. Piloting of the survey will be undertaken. Feedback regarding  
18 comprehensiveness of instructions and phrasing of questions and time for completion will be  
19 reviewed and the survey amended as necessary. Survey data will be analysed using descriptive  
20 and inferential statistics, including generalised linear modelling applied to Likert-type  
21 outcomes,<sup>47</sup> assisted by other categorical data analysis techniques.<sup>48</sup> To identify participant  
22 variations regarding views of key themes, responses will be compared both within and between  
23 stakeholder groups and accreditation domains.  
24  
25  
26  
27  
28  
29  
30  
31  
32  
33  
34  
35  
36  
37  
38  
39  
40  
41  
42  
43  
44

## 45 **Study 2: the patient experience across a range of settings**

46  
47 Study two aims to examine how the patient experience varies across a range of settings with  
48 different accreditation results. The study will be undertaken using the approach detailed below.  
49  
50

51  
52 The research team will review and update or adapt the partners' existing patient journey tools<sup>22</sup>  
53 for application in the acute, aged care and general practice settings. Three new purpose designed  
54 research tools, detailed below, will be produced: a 'patient experience questionnaire'; a 'HCO  
55  
56  
57  
58  
59  
60

1  
2  
3 patient trajectory tool'; and a 'health professional patient experience questionnaire'. The content  
4  
5 and structure of the tools will also be shaped by experience from the research team's previous  
6  
7 accreditation research work.<sup>3 5 12</sup> A three-stage recruitment and data collection process, indicating  
8  
9 participants and research tools, is outlined below and represented in Figure 2.  
10  
11

12  
13  
14 *Stage one: identify HCOs to participate*

15  
16 Stage one aims to identify HCOs to participate in the study. To recruit subjects the research team  
17  
18 will send an electronic request, that is, an invitation to participate in the study, to the  
19  
20 accreditation partners to forward on to the HCOs they accredit. The request will contain the  
21  
22 UNSW HREC approved study information and consent forms.<sup>34</sup>  
23  
24

25  
26 *Stage two: identify potential patients journey survey subjects*

27  
28 Identifying potential subjects within the nominated HCOs is the goal of stage two. The HCOs  
29  
30 nominating to participate will be approached by the research team to identify potential subjects  
31  
32 to track at the time of, or immediately following, the accreditation survey. Potential patients will  
33  
34 be those with healthcare journeys characterised as a complex case involving multiple  
35  
36 organisations, services, departments and health professionals. The research team and a HCO  
37  
38 representative using purposeful sampling<sup>38</sup> will together review potential subjects for the study.  
39  
40 Once a potential subject is identified, a HCO representative will forward an electronic or written  
41  
42 request from the research team to the potential subject to participate in the study. The request  
43  
44 will contain the UNSW HREC approved study information and consent forms.<sup>34</sup> Using this  
45  
46 process, the research team will seek to identify 20 patient journeys to investigate in each domain.  
47  
48 Based on prior research experience, including accreditation research studies,<sup>22-25</sup> this cohort is  
49  
50 expected to be appropriate to provide both depth and breadth of data to assess the patient  
51  
52 experience.  
53  
54  
55  
56  
57  
58  
59  
60

1  
2  
3  
4  
5  
6  
7  
8  
9  
10  
11  
12  
13  
14  
15  
16  
17  
18  
19  
20  
21  
22  
23  
24  
25  
26  
27  
28  
29  
30  
31  
32  
33  
34  
35  
36  
37  
38  
39  
40  
41  
42  
43  
44  
45  
46  
47  
48  
49  
50  
51  
52  
53  
54  
55  
56  
57  
58  
59  
60

*Stage three: construction of individual case studies*

Stage three involves the collection of data and construction of individual case studies. After confirmation of suitable subjects, the research team will initiate four actions. First, to capture the patients' experience of the care and services they received, a 'patient experience questionnaire' will be administered. The research team will speak with each patient to give them the choice to complete the questionnaire on paper or electronically. The patients, in addition to providing basic demographic data and reasons for attending the HCO, will be asked to report upon their experience of: making appointments; arrival; waiting for appointments; assessments; interactions with health professionals, including communication and understanding of issues; referral information; discharge; timeliness; and accessibility and negotiation of the physical environment. The questionnaire will use a five-point Likert scale and is expected to take 20 minutes to complete.

Second, a 'HCO patient trajectory audit tool' will be used to map the inter- and intra-organisational trajectory of individual patients. This tool will enable documentation of the HCOs, and the various services or departments within them, and health professionals or teams who provided significant assessment, intervention or advice to the patient or the primary health professionals or team caring for them. A researcher and HCO representative will examine the medical record to document these issues; it is anticipated that this task will take between one to four hours, depending on the domain.

Third, the health professionals or teams identified will be approached, in person or via telephone, by the research team or HCO representative and asked to participate. They will be surveyed using a 'health professional patient experience questionnaire'. The health professionals or team will be asked to comment upon: services and care provided, including assessments, interventions

1  
2  
3 and referrals undertaken; information provided; length and quality of interactions with the  
4 patient; and timeliness in provision of care. The questionnaire will use a five-point Likert scale  
5 and is expected to take 20 minutes to complete. Fourth, the research team will collect, from the  
6 accrediting bodies, each participating HCO's accreditation surveyor report and outcomes.  
7  
8  
9

10  
11  
12  
13 A case study of each patient experience will be constructed using the data collected from the  
14 three tools and documentary analysis<sup>33</sup> of the associated accreditation report and outcomes. Case  
15 study methodology, framed by complexity theory, will be used to seek to understand the system  
16 as an integrated whole.<sup>49</sup> Within the case study framework, the analysis activity will be the same  
17 as that defined for the retrospective analysis of the development of the consumer standard.  
18  
19  
20  
21  
22  
23  
24  
25  
26  
27  
28  
29  
30  
31  
32  
33  
34  
35  
36  
37  
38  
39  
40  
41  
42  
43  
44  
45  
46  
47  
48  
49  
50  
51  
52  
53  
54  
55  
56  
57  
58  
59  
60

1  
2  
3 Figure 1. Patient experience study recruitment and data collection process  
4  
5  
6  
7

## 8 **ETHICS AND DISSEMINATION**

9  
10 The ACCREDIT-SCI study has been approved by the UNSW HREC (HREC 10274). Study  
11 information sheets and consent forms explaining activities, processes and participant roles have  
12 been developed. A research team contact document has also been finalised for distribution to  
13 enable participants to raise questions or concerns. In accordance with UNSWHREC guidelines:  
14 complaints will be systematically recorded and actioned; prior to publication or presentation  
15 participant information will be de-identified; findings will be made available to participants; and  
16 research data will be stored in a secure location, accessible only to the research team, and deleted  
17 after a minimum of seven years.  
18  
19  
20  
21  
22  
23  
24  
25  
26  
27  
28  
29

30 Dissemination of study findings by the research team will occur through a variety of forms.  
31 Seminars will be conducted, with targeted invitations made to partners and stakeholders.  
32 Presentations will be made at national and international conferences, and journal articles  
33 developed for academic and industry publications. Additionally, information, updates and  
34 outcomes will be made via UNSW and partner websites.  
35  
36  
37  
38  
39  
40  
41  
42  
43  
44  
45

## 46 **CONCLUSION**

47  
48 The investigation of consumer involvement in health service accreditation programs is an  
49 important task that addresses a significant gap in the knowledge base. The ACCREDIT-SCI  
50 study protocol details two studies - one examining the effectiveness of a standard for consumer  
51 participation and the other exploring how patient experiences vary across a range of settings with  
52  
53  
54  
55  
56  
57  
58  
59  
60

1  
2  
3 differing accreditation results - that are designed to complement each other and meet this need.  
4  
5 The ACCREDIT research collaboration engages and uses the skills and experience of a diverse  
6  
7 range of academics, accrediting agency personnel and policy makers. In this way, the  
8  
9 collaboration provides capacity to implement the ACCREDIT-SCI study protocol and distribute  
10  
11 findings across the continuum of the health care industry.  
12  
13

14  
15  
16  
17  
18  
19 **ACKNOWLEDGEMENTS:** We acknowledge the staff of the industry partners (ACHS,  
20  
21 AGPAL and ACSAA) and the quality improvement agencies (ACSQHC and CEC) that are  
22  
23 providing support for the project.  
24  
25

26  
27 **AUTHORS' CONTRIBUTIONS:** All authors contributed to the writing of the ACCREDIT-  
28  
29 SCI study protocol and will assist implementation of the research activities.  
30  
31

32  
33 **FUNDING AND CONTRIBUTION TO THE RESEARCH:** This research is supported under  
34  
35 Australian Research Council's Linkage Projects scheme (LP100200586). The ARC has peer-  
36  
37 reviewed and funded the proposal but has no role in the implementation of the studies. The  
38  
39 industry partners may contribute to the implementation of the studies, analysis and interpretation  
40  
41 of findings and presentation of results. However, the final responsibility and decision making for  
42  
43 all research matters, including to publish papers in journals, resides with the UNSW.  
44  
45

46  
47 **ETHICS APPROVAL:** The UNSW Human Research Ethics Committee provided approval for  
48  
49 the studies (HREC 10274).  
50  
51

52  
53 **COMPETING INTERESTS:** The authors declare that they have no competing interests.  
54  
55  
56  
57  
58  
59  
60



1  
2  
3  
4  
5  
6  
7  
8  
9  
10  
11  
12  
13  
14  
15  
16  
17  
18  
19  
20  
21  
22  
23  
24  
25  
26  
27  
28  
29  
30  
31  
32  
33  
34  
35  
36  
37  
38  
39  
40  
41  
42  
43  
44  
45  
46  
47  
48  
49  
50  
51  
52  
53  
54  
55  
56  
57  
58  
59  
60  

## REFERENCES

1. Braithwaite J, Westbrook J, Johnston B, *et al.* Strengthening organizational performance through accreditation research: the ACCREDIT project. *BMC Res Notes* 2011;4:390.
2. Braithwaite J, Westbrook J, Pawsey M, *et al.* A prospective, multi-method, multi-disciplinary, multi-level, collaborative, social-organisational design for researching health sector accreditation [LP0560737]. *BMC Health Serv Res* 2006;6:113-23.
3. Greenfield D, Pawsey M, J B. The role and impact of accreditation on the healthcare revolution [O papel e o impacto da acreditação na revolução da atenção à saúde]. *Acreditação* 2012;1(2):1-14.
4. Greenfield D, Braithwaite J. Health sector accreditation research: a systematic review. *Int J Qual Health Care* 2008;20(3):172-83.
5. Greenfield D, Pawsey M, Braithwaite J. Accreditation: a global regulatory mechanism to promote quality and safety. In: Sollecito W, Johnson J, editors. *Continuous Quality Improvement in Health Care*. 4th ed. New York: Jones and Barlett Learning, 2013:513-31.
6. Greenfield D, Braithwaite J, Pawsey M. Health care accreditation surveyor styles typology. *Int J Health Care Qual Assur* 2008;21(5):435-43.
7. Arbuthnott A, Sharpe D. The effect of physician-patient collaboration on patient adherence in non-psychiatric medicine. *Patient Ed Counsel* 2009;77(1):60-67.
8. Meterko M, Wright S, Lin H, *et al.* Mortality among patients with acute myocardial infarction: the influences of patient-centered care and evidence-based medicine. *Health Serv Res* 2010;45(95):1188-204.
9. Boulding W, Glickman S, Manary M, *et al.* Relationship between patient satisfaction with inpatient care and hospital readmission within 30 days. *Am J Manag Care* 2011;17(1):41-48.
10. Charmel P, Frampton S. Building the business case for patient-centred care. *Healthcare Fin Manag* 2008;62(3):80-85.
11. O'Connor E, Fortune T, Doran J, *et al.* Involving consumers in accreditation: the Irish experience. *Int J Qual Health Care* 2007;19(5):296-300.
12. Braithwaite J, Greenfield D, Westbrook J, *et al.* Health service accreditation as a predictor of clinical and organisational performance: a blinded, random, stratified study. *Qual Saf Health Care* 2010;19(1):14-21.
13. Heuer A. Hospital accreditation and patients satisfaction: testing the relationship. *J Healthcare Qual* 2004;26(1):46-51.
14. Sack C, Scherag A, Lütkes P, *et al.* Is there an association between hospital accreditation and patient satisfaction with hospital care? A survey of 37 000 patients treated by 73 hospitals. *Int J Qual Health Care* 2011;23(3):278-83.
15. Sack C, Lutkes P, Gunther W, *et al.* Challenging the holy grail of hospital accreditation: a cross-sectional study of inpatient satisfaction in the field of cardiology. *BMC Health Serv Res* 2010;10.
16. Beaulieu DS, Epstein AM. National Committee on Quality Assurance health-plan accreditation: predictors, correlates of performance, and market impact. *Med Care* 2002;40(4):325-37.
17. Al Tehewy M, Salem B, Habil I, *et al.* Evaluation of accreditation program in non-governmental organizations' health units in Egypt: short-term outcomes. *Int J Qual Health Care* 2009;21(3):183-89.

18. Durieux P, Bissery A, Gasquet I, *et al.* Comparison of health care professionals' self-assessments of standards of care and patients' opinions on the care they received in hospital: observational study. *Qual Saf Health Care* 2004;13:198-202.
19. Auras S, Geraedts M. Patient experience data in practice accreditation - an international comparison. *Int J Qual Health Care* 2010;22(2):132-39.
20. Greenfield D, Braithwaite J. Developing the evidence base for accreditation of healthcare organizations: a call for transparency and innovation. *Qual Saf Health Care* 2009;18:162-63.
21. Greenfield D, Braithwaite J, Pawsey M, *et al.* Distributed leadership to mobilise capacity for accreditation research. *JoHM* 2009a;23(2):255-67.
22. Greenfield D, Hinchcliff R, Westbrook M, *et al.* An empirical test of accreditation patient journey surveys: randomised trial. *Int J Qual Health Care* 2012(First published online: July 11, 2012):doi: 10.1093/intqhc/mzs035.
23. Greenfield D, Moldovan M, Westbrook M, *et al.* An empirical test of short notice surveys in two accreditation programs. *Int J Qual Health Care* 2012;24(1):65-71.
24. Greenfield D, Pawsey M, Braithwaite J. What motivates health professionals to engage in the accreditation of healthcare organizations? *Int J Qual Health Care* 2011;23(1):8-14.
25. Greenfield D, Pawsey M, Naylor J, *et al.* Are accreditation surveys reliable? *Int J Health Care Qual Assur* 2009;22(2):105-16.
26. Nathan S, Greenfield D. Studying participation in action: researching accreditation. *Health Iss* 2007;91(Winter):8-9.
27. Greenfield D, Travaglia J, Braithwaite J, *et al.* Unannounced Surveys and Tracer Methodology: Literature Review. *A Report for the Australian Accreditation Research Network: Examining Future Health Care Accreditation Research*. Sydney: Centre for Clinical Governance Research, UNSW, 2007.
28. Greenfield D, Travaglia J, Pawsey M, *et al.* Intra-rater and Inter-rater Reliability in Healthcare Accreditation: Literature Review. Sydney: Centre for Clinical Governance Research in Health, UNSW, 2007.
29. Adrian A, Pawsey M, Braithwaite J, *et al.* Australian Accreditation Research Network Project - Final Report for the Department of Health and Ageing. Sydney: Australian Council on Healthcare Standards and the Centre for Clinical Governance Research, UNSW, 2007.
30. Australian Research Council. Linkage Projects. Canberra, 2012.
31. Knafl K, Breitmayer BJ. Triangulation in qualitative research: issues of conceptual clarity and purpose. In: Morse J, editor. *Qualitative Nursing Research: A Contemporary Dialogue*. Rockville, MD: Aspen, 1989:193-203.
32. Langley A. Strategies for theorising from process data. *Acad Manag Rev* 1999;24(4):691-710.
33. Scott J. *Documentary Research*. London: Sage, 2006.
34. University of New South Wales. Human Research Ethics Committee (HREC). Sydney, 2012.
35. Varavasovsky Z, Brugha R. How to do (or not to do)... A stakeholder analysis. *Health Pol Plan* 2000;15(3):338-45.
36. Bartunek J. Changing interpretive schemes and organisational restructuring: the example of a religious order. *Admin Sc Quart* 1984;29:355-72.

- 1  
2  
3 37. Lincoln YG, E. *Naturalistic Inquiry*. Beverly Hills, CA: Sage, 1985.  
4  
5 38. Creswell J, Plano Clark V. *Designing and conducting mixed methods research*. Thousand Oaks, California:  
6 Sage, 2010.  
7  
8 39. Ragin CC, Becker HS. How the microcomputer is changing our analytical habits. In: Blank G, McCartney JL,  
9 Brent E, editors. *New Technology in Sociology*. Brunswick, NJ: Transaction Publishers, 1989:47–55.  
10  
11 40. Hinchcliff R, Westbrook J, Greenfield D, *et al*. Analysis of Australian newspaper coverage of medication errors.  
12 *Int J Qual Health Care* 2012;24(1):1-8.  
13  
14 41. Greenfield D, Nugus P, Fairbrother G, *et al*. Applying and developing health service theory: an empirical  
15 study into clinical governance. *Clin Gov* 2011;16(1):8-19.  
16  
17 42. Greenfield D, Nugus P, Travaglia J, *et al*. Factors that shape the development of interprofessional improvement  
18 initiatives in health organisations. *Qual Saf Health Care* 2011(20 ):332-37.  
19  
20 43. QSR International. NVivo9: QSR International, 2011.  
21  
22 44. KeySurvey. KeySurvey online survey tool: World APP, 2011.  
23  
24 45. de Leeuw ED. Counting and measuring online: the quality of internet surveys. *Bull Methodol Sociol*  
25 2012;114:68-78.  
26  
27 46. Norman G. Likert scales, levels of measurement and the laws of statistics. *Adv Health Sci Educ Theory Pract*  
28 2010;15(5):625-32.  
29  
30 47. McCullagh P. Regression models for ordinal data. *J R Stat Soc Series B* 1980;42:109–42.  
31  
32 48. Agresti A. *Categorical Data Analysis*. 2nd ed. New York: Wiley-Interscience, 2002.  
33  
34 49. Anderson R, Crabtree B, Steele D, *et al*. Case study research: the view from complexity science. *Qual Health*  
35 *Res* 2005;15(5):669-85.  
36  
37  
38  
39  
40  
41  
42  
43  
44  
45  
46  
47  
48  
49  
50  
51  
52  
53  
54  
55  
56  
57  
58  
59  
60

1  
2  
3  
4  
5  
6  
7  
8  
9  
10  
11  
12  
13  
14  
15  
16  
17  
18  
19  
20  
21  
22  
23  
24  
25  
26  
27  
28  
29  
30  
31  
32  
33  
34  
35  
36  
37  
38  
39  
40  
41  
42  
43  
44  
45  
46  
47  
48  
49  
50  
51  
52  
53  
54  
55  
56  
57  
58  
59  
60

Figure 1. Patient experience study recruitment and data collection process

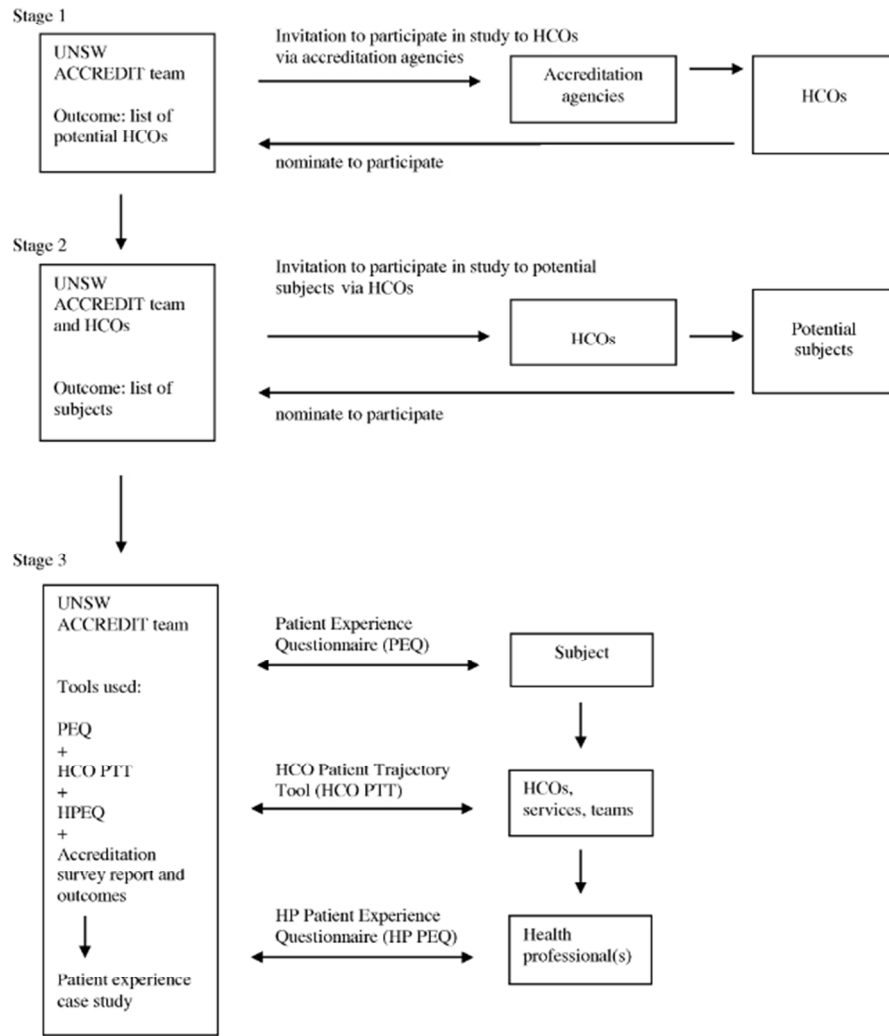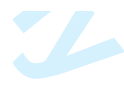

Supplement: bmjopen-2012-002024.draft_revisions.pdf [file bmjopen-2012-002024.draft_revisions.pdf]
